# Supplementary material for: Process evaluation of specialist nurse implementation of a soft opt-out organ donation system in Wales
Source: Springer Nature journal article supplement (doi:10.1186/s12913-019-4266-z), 2019-06-24
Supplement: MOESM3 [file 16847816]

## FORM C: Organ Donation: Questionnaire for Family/ Close Friends/ Appointed Representatives

Thank you for agreeing to fill out this questionnaire. Anybody involved in the donation decision can choose to fill out a questionnaire. The questions are quite short but feel free to add more details at the bottom. There is an option to complete this online if you prefer: <https://bangor.onlinesurveys.ac.uk/organ-donation-project-questionnaire>. There is no limit to the number of questionnaires per family. By returning the completed questionnaire to the research team at Bangor University, it will be assumed that you have given your consent for the researchers to analyse and use the data.

1. Are you: spouse or partner  parent or child  brother or sister  grandparent or grandchild  niece or nephew  stepfather or stepmother  half-brother or half-sister  friend of long standing  Appointed Representative

(An appointed representative is a person appointed by your loved one or close friend during their lifetime to convey their organ donation decision after their death.)

2. Did your loved one or close friend pass away in a hospital in:

Wales  (go to Q.4) England  (go to Q.3)

3. Did you know that the changes to consenting to organ donation in Wales did not apply in England? Yes  No  Uncertain

4. On the organ donor register, did your loved one or close friend:

Opt In  Opt Out  Appoint a Representative  Do Nothing

5. Did you know about your loved one or close friend's decision on the organ donor register?

Yes  No  Uncertain  Non Applicable

6. Did your loved one or close friend ever discuss their donation decision with you?

Yes  No  Uncertain  Non Applicable

7. Did you support your loved one or close friend's organ donation decision after they passed away?

Yes  No  Uncertain  Non Applicable

8. Did you feel able to support the deemed consent of your loved one or close friend when the changes to consenting to organ donation in Wales were explained by a specialist nurse in organ donation?

Yes  No  Uncertain  Non Applicable

9. Do you consider yourself the decision maker on behalf of your loved one or friend who passed away? Yes  No  (go to Q.11)

10. As the decision maker, did the changes to consenting to organ donation in Wales help you at this difficult time?

Yes  No  Uncertain

Please turn over the page now
